# Supplementary material for: Sesquiterpene emissions from Alternaria alternata and Fusarium oxysporum: Effects of age, nutrient availability, and co-cultivation
Source: PubMed Central journal article supplement (PMC4768142; doi:10.1038/srep22152), 2016-02-26
Supplement: srep22152-s1.pdf [file srep22152-s1.pdf]

## Supplementary Materials

### Sesquiterpene emissions from *Alternaria alternata* and *Fusarium oxysporum*:

#### Effects of age, nutrient availability, and co-cultivation

Fabian Weikl, Andrea Ghirardo, Jörg-Peter Schnitzler, Karin Pritsch

#### Table of Contents:

##### Supplementary Figures

**Figure S1**

**Figure S2**

**Figure S3**

**Figure S4**

**Figure S5**

**Figure S6**

**Figure S7**

##### Supplementary Tables

**Table S1**

**Table S2**

**Table S3**

**Table S4**

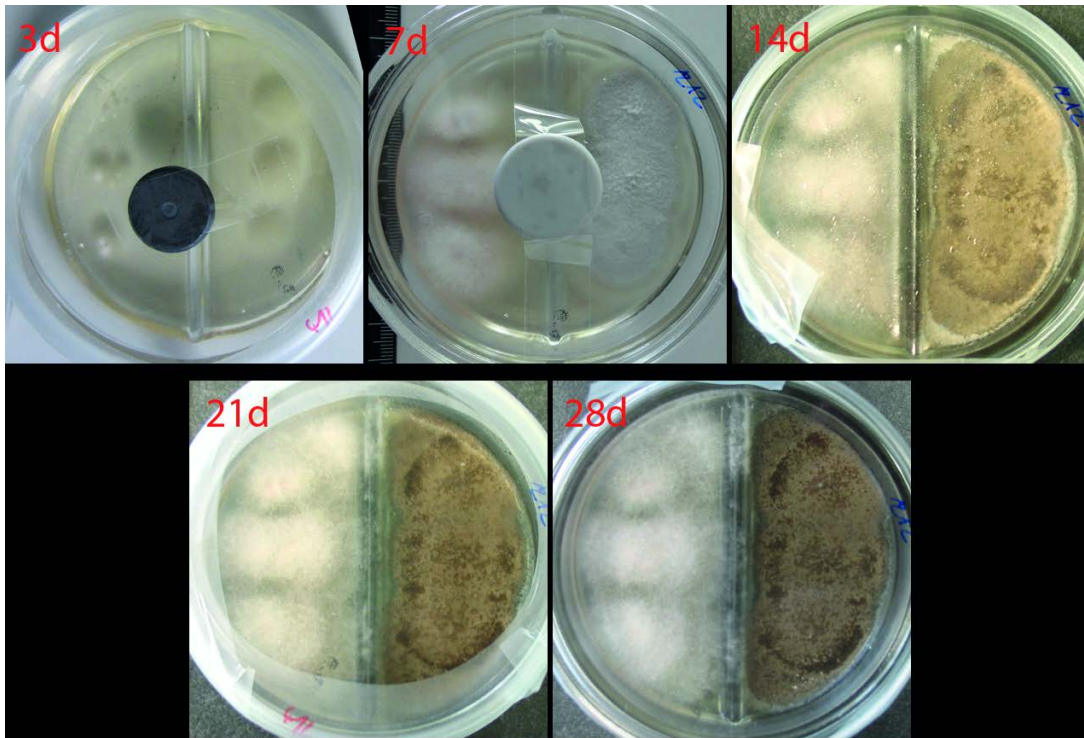

**Figure S1** Time series (dates of VOC samplings) on the morphology of a shared split-plate with nutrient rich conditions. Left halves: *Fusarium oxysporum*, right halves: *Alternaria alternata*. d: days after inoculation.

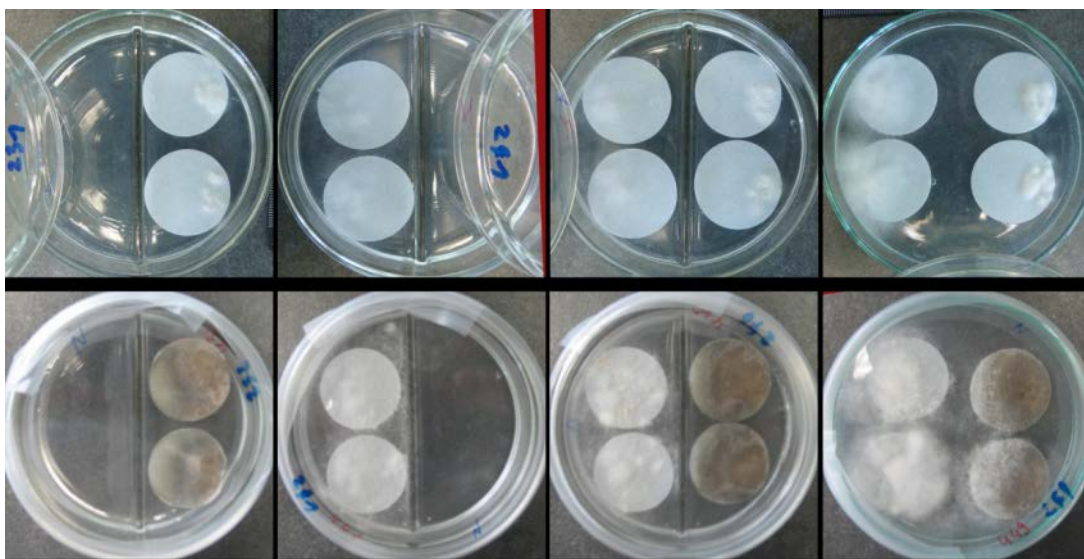

**Figure S2** Culture morphology under nutrient poor conditions. Upper panel: at the first VOC sampling (day 14 after inoculation); lower panel: at the last VOC-sampling (day 35). From left to right: *Alternaria alternata* solitary, *Fusarium oxysporum* solitary, shared split-plate (left half *F. oxysporum*, right half *A. alternata*), direct confrontation (left half *F. oxysporum*, right half *A. alternata*).

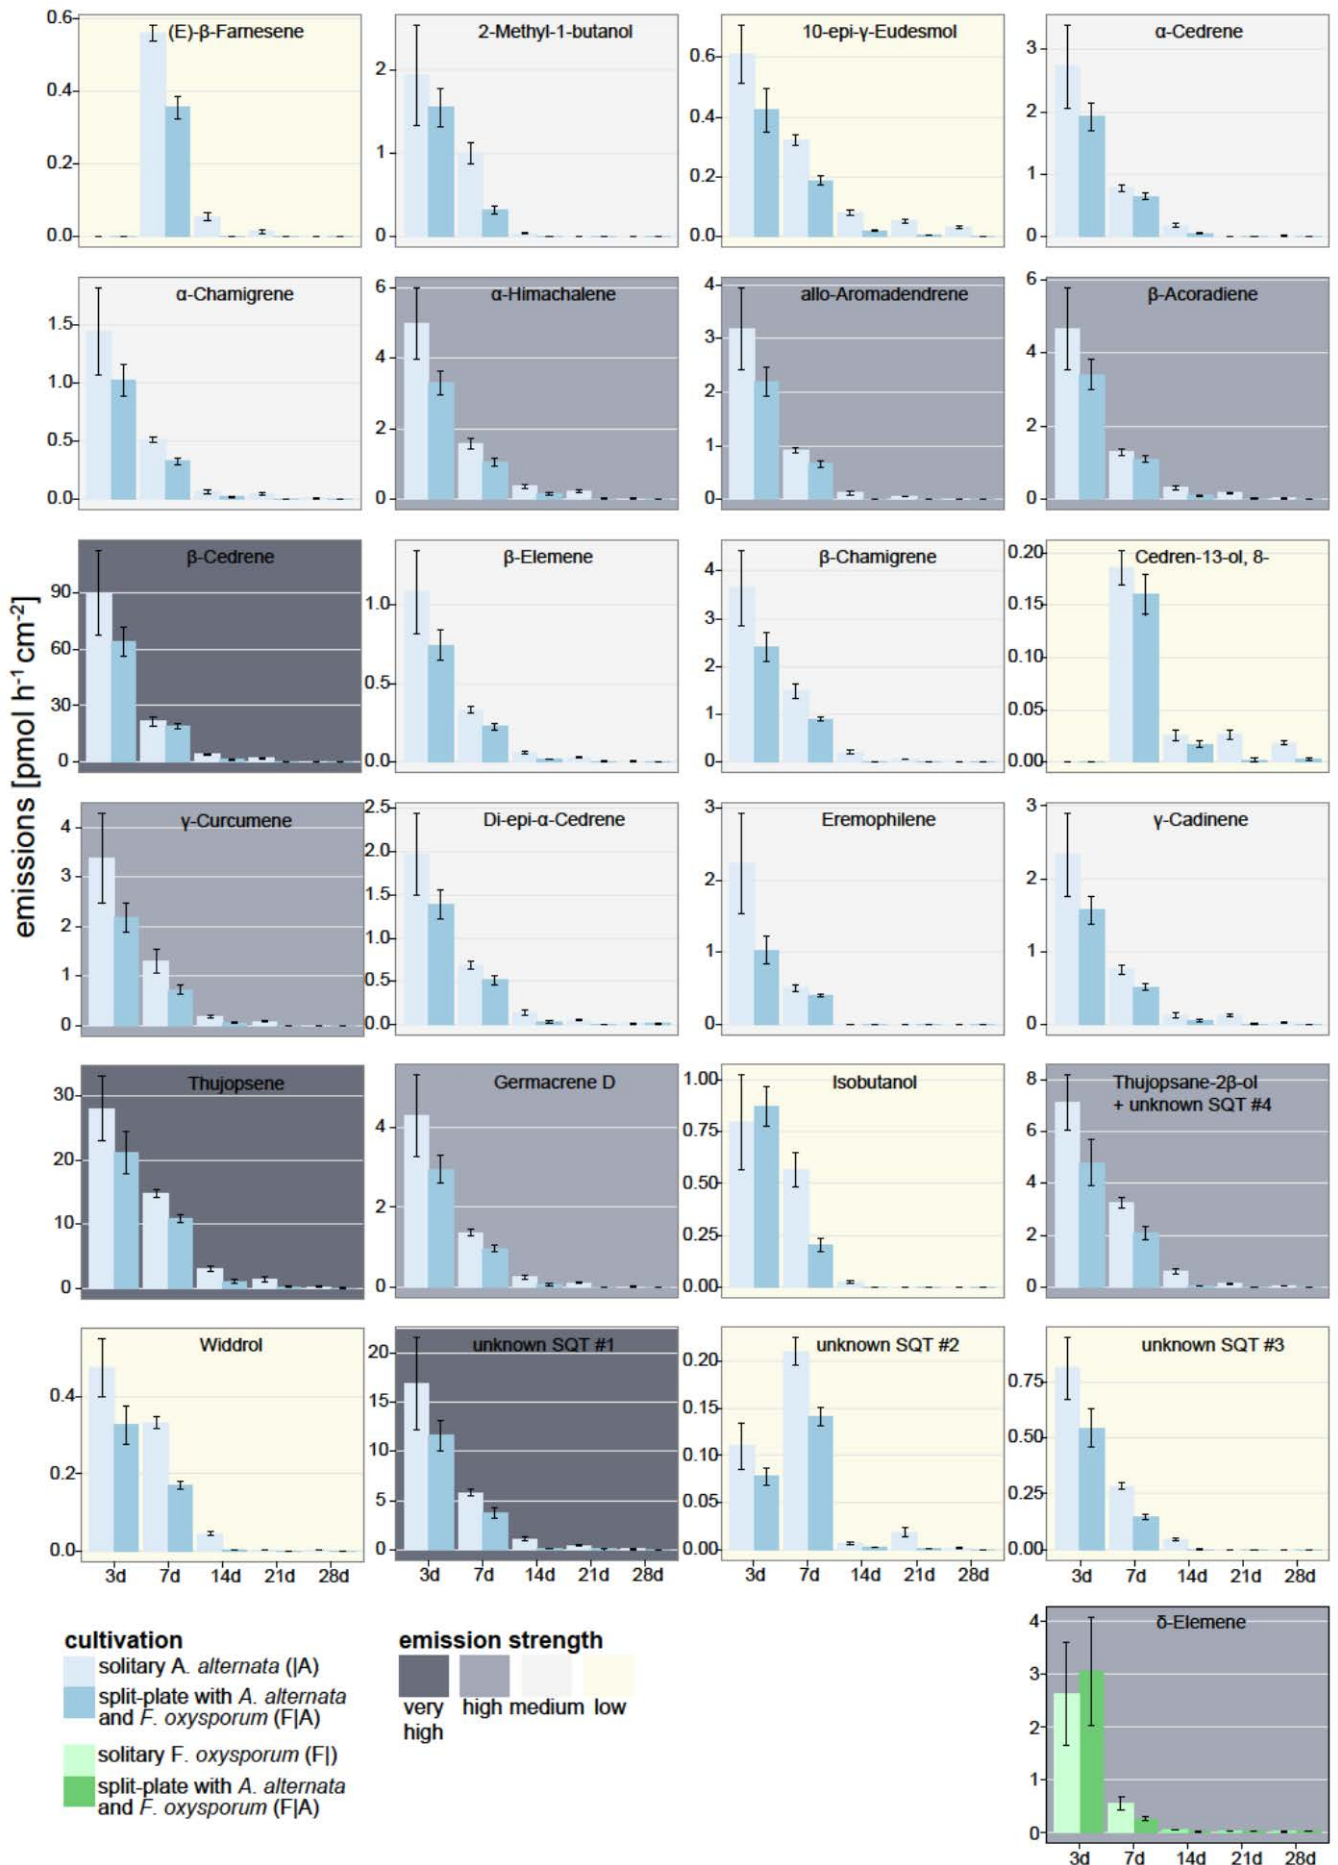

**Figure S3** Comparisons between solitarily grown *Alternaria alternata* (solitary *Fusarium oxysporum* in the case of  $\delta$ -elemene) and split-plates with *A. alternata* and *F. oxysporum* on nutrient rich medium. Emission rates of each compound calculated based on *A. alternata* mycelium area, except for  $\delta$ -elemene, for which emission rates were calculated based on *F. oxysporum* mycelium area; error bars: s.e. (n = 5).

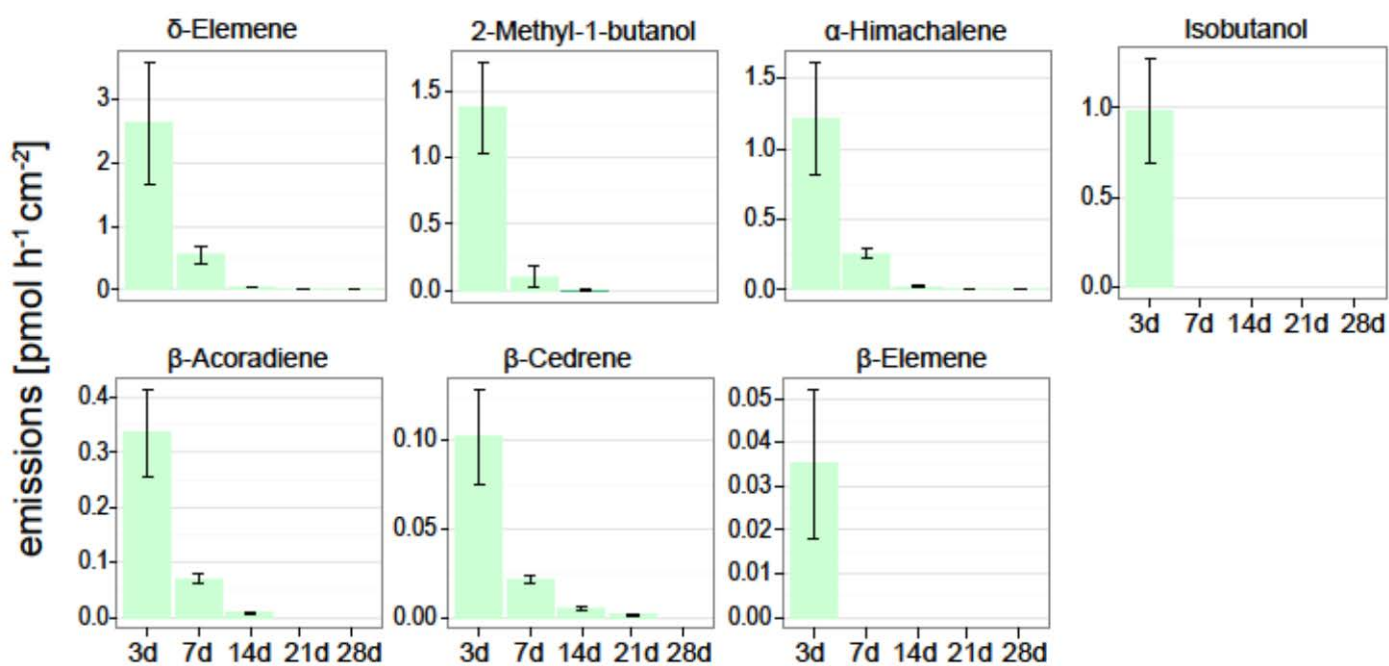

**Figure S4** Emission rates of solitarily grown *Fusarium oxysporum* on nutrient rich medium. Emission rates of each compound calculated based on *F. oxysporum* mycelium area; error bars: s.e. (n = 5). The substances emitted at rates lower than 0.01 pmol cm<sup>-2</sup> h<sup>-1</sup> (γ-curcurnene, germacrene-D, and the unknown SQT #2) are not displayed (cf. Supplementary Table S3).

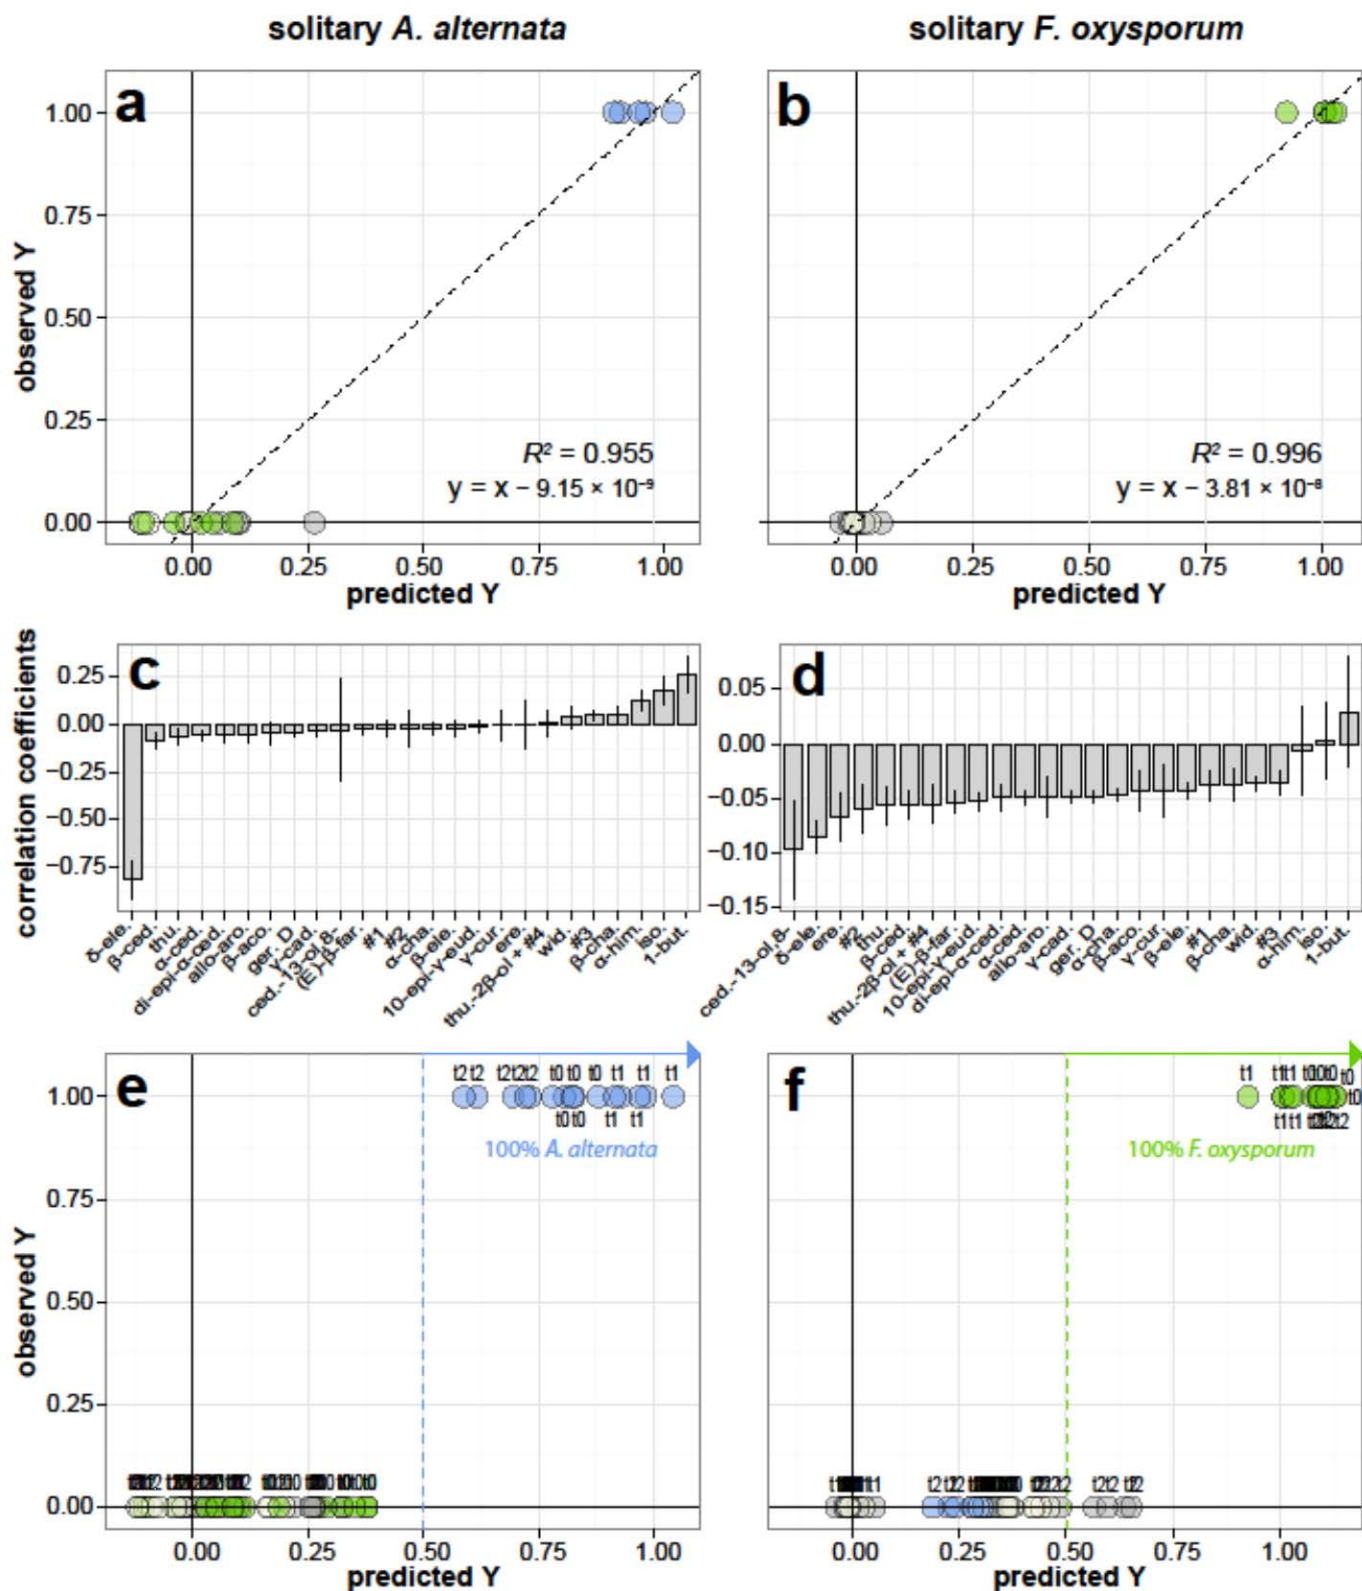

**Figure S5** Observed versus predicted Y-values of orthogonal partial least square (OPLS) analysis referred to *Alternaria alternata* (a) and *Fusarium oxysporum* (b) modeled using VOC profile data from 7 days old culture and growing with nutrient rich media, and corresponding correlation coefficient plots (c, d); prediction plots of VOC profiles from day 3,7,14 (nutrient rich) (e, f): predicted Y-values > 0.5 are classified as *A. alternata* in (e) and *F.oxysporum* in (f). Colored dots: blue: solitarily grown *A. alternata*, green: solitarily grown *F. oxysporum*, grey: split-plates with both fungi, beige: direct confrontations. Error bars: confidence intervals based on jack-knifing uncertainty method. Regression lines: goodness of fit. OPLS model fitness:  $R^2(X) = 98.6\%$ ,  $R^2(Y) = 100\%$ ,  $r^2 = 76.8\%$ ,  $Q^2(\text{cum}) = 70.1\%$  using 3 predictive components . RMSEE: *A. alternata* = 0.102; *F. oxysporum* = 0.029; RMSEcv: *A. alternata* = 0.101; *F. oxysporum* = 0.031. *P*-values of cross-validated ANOVA: *A. alternata* (solitary),  $P < 2 \times 10^{-7}$ ; *F. oxysporum*  $P < 4 \times 10^{-14}$ . Partly overlapped text (e, f): t1 (day 3 VOC sampling), t1 (day 7), t2 (day 14).



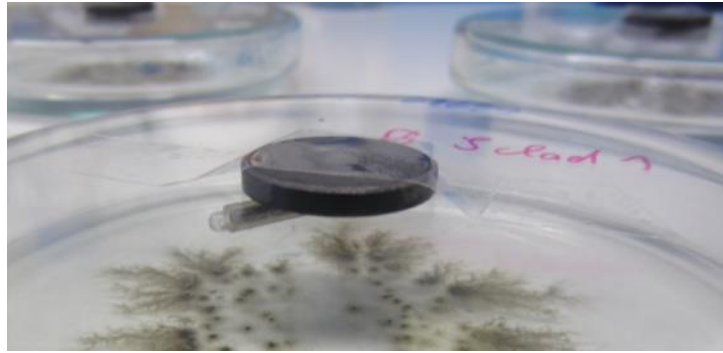

**Figure S7** Example of a PDMS-twister (polydimethylsiloxane coated stir bar) attached to the inside of a glass culture-dish's lid and held in place by a magnet on the outside of the dish (pre-test with a *Cladosporium* isolate).

**Table S1** VOC mission rate per plate ( $\text{pmol plate}^{-1} \text{h}^{-1}$ ) for all sampling dates (days post inoculation) of nutrient rich and nutrient poor cultures of solitary fungi; s.e.: standard error ( $n = 5$ ); nd: not detectable.

| <i>Alternaria alternata</i> solitary  A     | nutrient rich (malt extract gelrite) |                |                 |                 |                 | nutrient poor (synth. nutrient poor gelrite) |                 |                 |                 |
|---------------------------------------------|--------------------------------------|----------------|-----------------|-----------------|-----------------|----------------------------------------------|-----------------|-----------------|-----------------|
|                                             | 3<br>days s.e.                       | 7<br>days s.e. | 14<br>days s.e. | 21<br>days s.e. | 28<br>days s.e. | 14<br>days s.e.                              | 21<br>days s.e. | 28<br>days s.e. | 35<br>days s.e. |
| Isobutanol                                  | 2.2 0.13                             | 11.9 1.9       | 1.14 0.24       | nd nd           | nd nd           | nd nd                                        | nd nd           | nd nd           | nd nd           |
| 2-Methyl-1-butanol                          | 5.21 0.37                            | 21.1 2.5       | 1.89 0.39       | nd nd           | nd nd           | nd nd                                        | nd nd           | nd nd           | nd nd           |
| $\beta$ -Elemene                            | 3.0 0.20                             | 6.92 0.46      | 2.87 0.52       | 1.70 0.28       | 0.260 0.10      | 0.143 0.01                                   | 0.046 <0.01     | nd nd           | 0.028 <0.01     |
| Di-epi- $\alpha$ -cedrene                   | 5.44 0.34                            | 14.3 0.8       | 6.44 1.72       | 3.17 0.62       | 0.516 0.14      | 0.237 0.03                                   | 0.064 0.01      | nd nd           | 0.041 <0.01     |
| $\alpha$ -Cedrene                           | 7.5 0.44                             | 16.3 0.6       | 8.73 1.33       | nd nd           | 0.789 0.32      | nd nd                                        | 0.056 0.02      | nd nd           | 0.079 <0.01     |
| $\beta$ -Cedrene                            | 248.5 15.6                           | 446.5 39.6     | 189.7 20.2      | 127.7 23.1      | 10.9 5.4        | 9.21 1.15                                    | 2.26 0.54       | 0.185 0.07      | 1.55 0.02       |
| Thujopsene                                  | 82.2 8.1                             | 308.1 6.5      | 144.0 20.1      | 87.3 24.6       | 10.6 7.0        | 3.90 0.31                                    | 4.18 0.54       | 1.45 0.16       | 2.66 0.17       |
| $\delta$ -Elemene                           | nd nd                                | nd nd          | nd nd           | nd nd           | nd nd           | nd nd                                        | nd nd           | nd nd           | nd nd           |
| (E)- $\beta$ -Farnesene                     | nd nd                                | 11.8 0.4       | 2.57 0.55       | 0.861 0.26      | 0.045 0.01      | 0.211 0.02                                   | 0.056 0.02      | 0.035 <0.01     | 0.016 <0.01     |
| $\beta$ -acoradiene                         | 12.9 0.8                             | 26.8 1.1       | 15.0 2.6        | 10.4 1.73       | 2.16 0.72       | 0.844 0.15                                   | 0.236 0.03      | nd nd           | nd nd           |
| $\alpha$ -Himachalene                       | 13.6 2.0                             | 33.0 3.3       | 17.6 3.0        | 14.2 2.57       | 1.21 0.57       | 1.25 0.14                                    | 0.291 0.08      | nd nd           | 0.234 <0.01     |
| $\beta$ -Chamigrene                         | 10.8 0.7                             | 31.0 2.5       | 9.60 1.66       | 3.41 0.54       | nd nd           | nd nd                                        | nd nd           | nd nd           | nd nd           |
| unknown SQT #2                              | 0.308 0.02                           | 4.4 0.3        | 0.330 0.06      | 1.10 0.27       | 0.083 0.05      | 0.093 0.01                                   | 0.004 <0.01     | 0.015 <0.01     | 0.024 <0.01     |
| unknown SQT #1                              | 43.7 4.3                             | 121.0 7.0      | 50.9 10.2       | 25.3 3.5        | 3.42 1.30       | 0.329 0.03                                   | 0.623 0.16      | nd nd           | nd nd           |
| allo-Aromadendrene                          | 8.8 0.52                             | 19.2 1.3       | 5.77 1.58       | 3.35 0.60       | 0.229 0.11      | 0.276 0.11                                   | nd nd           | nd nd           | nd nd           |
| $\gamma$ -Curcumene                         | 9.30 0.73                            | 27.2 4.4       | 9.07 1.39       | 5.09 1.05       | nd nd           | 0.353 0.08                                   | 0.241 0.01      | 0.122 0.02      | nd nd           |
| Germacrene D                                | 11.9 0.7                             | 28.5 1.8       | 11.9 2.2        | 6.83 1.53       | 0.553 0.34      | 0.505 0.06                                   | 0.163 0.04      | 0.031 <0.01     | 0.114 <0.01     |
| Eremophilene                                | 5.5 0.63                             | 10.8 1.4       | nd nd           | nd nd           | nd nd           | nd nd                                        | nd nd           | nd nd           | nd nd           |
| $\alpha$ -Chamigrene                        | 4.0 0.18                             | 10.8 0.5       | 3.10 0.62       | 2.92 0.46       | 0.607 0.24      | 0.123 0.01                                   | 0.039 <0.01     | 0.005 <0.01     | 0.032 <0.01     |
| $\gamma$ -cadinene                          | 6.42 0.41                            | 15.9 1.5       | 6.22 1.58       | 7.34 1.15       | 1.47 0.57       | 0.293 0.04                                   | 0.094 0.02      | nd nd           | 0.072 <0.01     |
| unknown SQT #3                              | 2.4 0.17                             | 5.96 0.32      | 2.26 0.26       | nd nd           | 0.064 <0.01     | 0.160 0.01                                   | 0.046 <0.01     | nd nd           | 0.058 <0.01     |
| Thujopsane-2 $\beta$ -ol<br>+unknown SQT #4 | 23.4 3.0                             | 67.6 2.6       | 28.9 4.8        | 8.35 1.23       | 2.01 0.24       | nd nd                                        | nd nd           | 1.04 0.04       | 1.57 0.22       |
| Widdrol                                     | 1.44 0.15                            | 7.0 0.35       | 2.11 0.30       | 0.179 0.02      | 0.048 <0.01     | nd nd                                        | nd nd           | 0.130 0.02      | 0.043 <0.01     |
| 10-epi- $\gamma$ -Eudesmol                  | 1.86 0.18                            | 6.73 0.26      | 3.80 0.39       | 3.17 0.33       | 1.85 0.23       | 0.233 0.02                                   | 0.151 0.01      | 0.095 0.01      | 0.155 0.01      |
| Cedren-13-ol, 8-                            | nd nd                                | 3.91 0.36      | 1.17 0.21       | 1.56 0.24       | 1.11 0.09       | nd nd                                        | nd nd           | nd nd           | nd nd           |

  

| <i>Fusarium oxysporum</i> solitary  F | 3<br>days s.e. | 7<br>days s.e. | 14<br>days s.e. | 21<br>days s.e. | 28<br>days s.e. | 14<br>days s.e. | 21<br>days s.e. | 28<br>days s.e. | 35<br>days s.e. |
|---------------------------------------|----------------|----------------|-----------------|-----------------|-----------------|-----------------|-----------------|-----------------|-----------------|
| Isobutanol                            | 0.987 0.16     | nd nd          | nd nd           | nd nd           | nd nd           | 0.004 <0.01     | nd nd           | nd nd           | nd nd           |
| 2-Methyl-1-butanol                    | 1.43 0.24      | 1.17 0.78      | 0.093 0.04      | nd nd           | nd nd           | nd nd           | nd nd           | nd nd           | nd nd           |
| $\beta$ -Elemene                      | 0.028 <0.01    | nd nd          | nd nd           | nd nd           | nd nd           | 0.004 <0.01     | 0.001 <0.01     | nd nd           | nd nd           |
| $\beta$ -Cedrene                      | 0.107 0.02     | 0.361 0.05     | 0.203 0.06      | 0.073 0.03      | nd nd           | nd nd           | nd nd           | nd nd           | nd nd           |
| $\delta$ -Elemene                     | 2.44 0.17      | 8.40 0.66      | 2.01 0.38       | 1.01 0.25       | 0.587 0.14      | 0.552 0.15      | nd nd           | 0.127 0.05      | nd nd           |
| $\beta$ -acoradiene                   | 0.360 0.06     | 1.16 0.16      | 0.316 0.08      | 0.109 0.05      | nd nd           | 0.298 0.08      | 0.039 <0.01     | nd nd           | nd nd           |
| $\alpha$ -Himachalene                 | 1.17 0.10      | 4.09 0.28      | 1.078 0.18      | 0.54 0.14       | 0.291 0.08      | 0.279 0.07      | 0.137 0.02      | nd nd           | 0.044 <0.01     |
| unknown SQT #2                        | nd nd          | 0.009 <0.01    | nd nd           | 0.010 <0.01     | nd nd           | nd nd           | nd nd           | nd nd           | nd nd           |
| $\gamma$ -Curcumene                   | nd nd          | nd nd          | 0.105 0.03      | 0.111 0.05      | nd nd           | 0.011 0.01      | nd nd           | 0.060 0.02      | nd nd           |
| Germacrene D                          | nd nd          | 0.064 <0.01    | nd nd           | nd nd           | nd nd           | nd nd           | nd nd           | nd nd           | nd nd           |

**Table S2** VOC mission rate per plate (pmol plate<sup>-1</sup> h<sup>-1</sup>) for all sampling dates (days post inoculation) of nutrient rich and nutrient poor co-cultivations; s.e.: standard error (n = 5); nd: not detectable.

| split-plate F A    | nutrient rich (malt extract gelrite) |            |             |            |             | nutrient poor (synth. nutrient poor gelrite) |             |             |             |  |
|--------------------|--------------------------------------|------------|-------------|------------|-------------|----------------------------------------------|-------------|-------------|-------------|--|
|                    | 3                                    | 7          | 14          | 21         | 28          | 14                                           | 21          | 28          | 35          |  |
| Compounds          | days s.e.                            | days s.e.  | days s.e.   | days s.e.  | days s.e.   | days s.e.                                    | days s.e.   | days s.e.   | days s.e.   |  |
| Isobutanol         | 3.01 0.19                            | 4.17 0.70  | nd nd       | nd nd      | nd nd       | nd nd                                        | nd nd       | nd nd       | nd nd       |  |
| 2-Methyl-1-butanol | 5.29 0.55                            | 6.65 1.00  | nd nd       | nd nd      | nd nd       | nd nd                                        | nd nd       | nd nd       | nd nd       |  |
| β-Elementene       | 2.53 0.17                            | 4.60 0.43  | 0.472 0.07  | 0.109 0.04 | 0.043 0.02  | 0.116 0.02                                   | 0.031 <0.01 | nd nd       | nd nd       |  |
| Di-epi-α-cedrene   | 4.75 0.25                            | 10.5 1.2   | 0.822 0.25  | nd nd      | 0.253 0.07  | 0.181 0.03                                   | 0.034 <0.01 | nd nd       | 0.030 <0.01 |  |
| α-Cedrene          | 6.58 0.31                            | 13.2 1.2   | 1.43 0.27   | 0.301 0.10 | 0.088 0.05  | nd nd                                        | 0.053 <0.01 | nd nd       | 0.021 <0.01 |  |
| β-Cedrene          | 218.2 11.5                           | 390.1 32.6 | 35.6 9.1    | 3.69 1.76  | 0.769 0.43  | 6.71 1.16                                    | 1.11 0.07   | nd nd       | nd nd       |  |
| Thujopsene         | 72.7 9.3                             | 219.3 11.4 | 28.7 9.1    | 4.52 2.93  | 0.960 0.52  | 2.66 0.36                                    | 1.36 0.08   | 0.099 0.02  | 0.011 0.01  |  |
| δ-Elementene       | 2.06 0.15                            | 4.81 0.63  | 0.236 0.11  | 0.584 0.09 | 0.329 0.04  | 0.483 0.05                                   | nd nd       | 0.430 0.07  | nd nd       |  |
| (E)-β-Farnesene    | nd nd                                | 7.29 0.74  | 0.039 <0.01 | nd nd      | 0.015 <0.01 | 0.171 0.04                                   | 0.022 <0.01 | nd nd       | nd nd       |  |
| β-acoradiene       | 11.6 0.6                             | 22.4 2.0   | 2.694 0.54  | 0.538 0.19 | 0.410 0.25  | 0.817 0.21                                   | 0.124 0.03  | nd nd       | nd nd       |  |
| α-Himachalene      | 12.0 2.1                             | 21.3 2.3   | 4.30 1.51   | 0.577 0.18 | 0.235 0.05  | 1.12 0.14                                    | 0.175 <0.01 | 0.247 0.02  | 0.084 <0.01 |  |
| β-Chamigrene       | 8.23 0.50                            | 18.4 1.5   | nd nd       | nd nd      | nd nd       | nd nd                                        | nd nd       | nd nd       | nd nd       |  |
| unknown SQT #2     | 0.27 0.01                            | 2.88 0.27  | 0.053 0.01  | 0.027 0.01 | 0.009 <0.01 | 0.069 <0.01                                  | 0.002 <0.01 | 0.015 <0.01 | nd nd       |  |
| unknown SQT #1     | 39.7 2.5                             | 76.5 11.4  | 3.10 0.29   | 1.42 0.21  | nd nd       | 0.862 0.53                                   | 0.233 0.02  | nd nd       | nd nd       |  |
| allo-Aromadendrene | 7.51 0.39                            | 13.4 1.2   | 0.382 0.11  | nd nd      | nd nd       | 0.297 0.14                                   | nd nd       | nd nd       | nd nd       |  |
| γ-Curcumene        | 7.57 0.75                            | 14.6 1.6   | 1.53 0.51   | 0.099 0.07 | nd nd       | 0.508 0.11                                   | nd nd       | 0.141 0.02  | nd nd       |  |
| Germacrene D       | 10.1 0.5                             | 19.7 1.8   | 1.69 0.68   | 0.135 0.08 | 0.034 0.01  | 0.371 0.06                                   | 0.064 <0.01 | 0.002 <0.01 | nd nd       |  |
| Eremophilene       | 3.58 0.70                            | 8.3 0.4    | nd nd       | nd nd      | nd nd       | nd nd                                        | nd nd       | nd nd       | nd nd       |  |
| α-Chamigrene       | 3.50 0.21                            | 6.75 0.65  | 0.584 0.14  | 0.091 0.03 | 0.019 0.02  | 0.114 0.03                                   | 0.023 <0.01 | nd nd       | nd nd       |  |
| γ-cadinene         | 5.39 0.29                            | 10.5 1.0   | 1.47 0.35   | 0.207 0.08 | 0.073 0.03  | 0.233 0.04                                   | 0.053 <0.01 | nd nd       | 0.002 <0.01 |  |
| unknown SQT #3     | 1.87 0.24                            | 2.95 0.32  | 0.045 0.02  | nd nd      | nd nd       | nd nd                                        | 0.023 <0.01 | nd nd       | nd nd       |  |
| Thujopsane-2β-ol   | 16.3 2.0                             | 42.8 5.9   | 1.35 0.31   | nd nd      | nd nd       | nd nd                                        | nd nd       | nd nd       | nd nd       |  |
| +unknown SQT #4    | 16.3 2.0                             | 42.8 5.9   | 1.35 0.31   | nd nd      | nd nd       | nd nd                                        | nd nd       | nd nd       | nd nd       |  |
| Widdrol            | 1.14 0.15                            | 3.50 0.19  | 0.035 0.01  | nd nd      | nd nd       | nd nd                                        | nd nd       | nd nd       | nd nd       |  |
| 10-epi-γ-Eudesmol  | 1.45 0.21                            | 3.87 0.41  | 0.568 0.12  | 0.148 0.02 | 0.044 <0.01 | nd nd                                        | 0.058 <0.01 | 0.007 <0.01 | nd nd       |  |
| Cedren-13-ol, 8-   | nd nd                                | 3.27 0.42  | 0.459 0.10  | 0.065 0.05 | 0.082 0.04  | nd nd                                        | nd nd       | nd nd       | nd nd       |  |

  

| direct confrontation FA | 3          | 7          | 14         | 21         | 28          | 14         | 21          | 28          | 35          |
|-------------------------|------------|------------|------------|------------|-------------|------------|-------------|-------------|-------------|
| Compounds               | days s.e.  | days s.e.  | days s.e.  | days s.e.  | days s.e.   | days s.e.  | days s.e.   | days s.e.   | days s.e.   |
| Isobutanol              | 2.28 0.18  | 4.88 0.97  | nd nd      | nd nd      | nd nd       | nd nd      | nd nd       | nd nd       | nd nd       |
| 2-Methyl-1-butanol      | 4.07 0.38  | 8.44 1.92  | nd nd      | nd nd      | nd nd       | nd nd      | nd nd       | nd nd       | nd nd       |
| β-Elementene            | 1.82 0.22  | 4.98 0.34  | 1.38 0.11  | 0.369 0.03 | 0.094 0.03  | 0.610 0.18 | 0.046 <0.01 | nd nd       | nd nd       |
| Di-epi-α-cedrene        | 3.31 0.42  | 11.7 0.6   | 3.45 0.34  | 0.462 0.07 | 1.16 0.49   | 1.26 0.41  | 0.059 0.01  | nd nd       | 0.041 0.02  |
| α-Cedrene               | 4.68 0.57  | 14.3 0.7   | 4.61 0.47  | 1.00 0.13  | 0.209 0.09  | nd nd      | 0.092 0.01  | nd nd       | 0.030 <0.01 |
| β-Cedrene               | 152.5 19.6 | 421.3 21.0 | 127.5 12.6 | 15.9 3.3   | 2.16 1.14   | 53.6 18.0  | 2.26 0.34   | nd nd       | nd nd       |
| Thujopsene              | 38.73 3.9  | 206.1 18.4 | 86.3 6.7   | 12.5 2.0   | 1.64 0.89   | 5.94 1.81  | 1.09 0.09   | nd nd       | 0.009 <0.01 |
| δ-Elementene            | 3.83 0.33  | 13.4 1.03  | 0.562 0.08 | 0.630 0.11 | 0.282 0.08  | 1.18 0.30  | nd nd       | 0.482 0.13  | nd nd       |
| (E)-β-Farnesene         | 1.01 0.10  | 6.18 0.34  | nd nd      | nd nd      | 0.030 0.01  | 0.967 0.37 | 0.036 <0.01 | 0.013 <0.01 | nd nd       |
| β-acoradiene            | 8.23 1.02  | 24.4 1.3   | 7.67 0.75  | 1.34 0.24  | 0.805 0.34  | 3.50 0.92  | 0.203 0.04  | nd nd       | nd nd       |
| α-Himachalene           | 12.66 2.1  | 22.5 1.5   | 14.6 1.8   | 1.45 0.32  | 0.538 0.14  | 6.67 1.86  | 0.295 0.03  | 0.583 0.17  | 0.148 0.02  |
| β-Chamigrene            | 4.61 0.37  | 16.9 0.8   | nd nd      | nd nd      | nd nd       | nd nd      | nd nd       | nd nd       | nd nd       |
| unknown SQT #2          | 0.184 0.02 | 2.38 0.49  | 0.167 0.02 | 0.086 0.02 | 0.011 <0.01 | 0.440 0.13 | 0.002 <0.01 | 0.014 <0.01 | nd nd       |
| unknown SQT #1          | 27.5 2.1   | 92.5 5.7   | 11.5 3.8   | 3.02 0.35  | 0.822 0.31  | 0.959 0.34 | 0.508 0.07  | nd nd       | nd nd       |
| allo-Aromadendrene      | 5.25 0.63  | 14.7 0.9   | 3.15 0.41  | nd nd      | nd nd       | 1.87 0.58  | nd nd       | nd nd       | nd nd       |
| γ-Curcumene             | 5.93 0.72  | 15.1 2.1   | 3.87 0.80  | 0.256 0.04 | nd nd       | 2.79 0.51  | 0.267 0.03  | 0.230 0.02  | nd nd       |
| Germacrene D            | 7.05 0.85  | 20.7 1.2   | 5.71 0.65  | 0.467 0.11 | 0.053 0.03  | 2.49 0.76  | nd nd       | nd nd       | nd nd       |
| Eremophilene            | 2.96 0.54  | 6.35 0.43  | nd nd      | nd nd      | nd nd       | nd nd      | nd nd       | nd nd       | nd nd       |
| α-Chamigrene            | 2.65 0.28  | 6.78 0.41  | 1.50 0.16  | 0.243 0.05 | 0.045 0.03  | 1.34 0.40  | 0.035 <0.01 | nd nd       | nd nd       |
| γ-cadinene              | 3.82 0.48  | 10.8 0.6   | 3.83 0.41  | 0.590 0.12 | 0.127 0.05  | 1.43 0.41  | 0.089 0.01  | nd nd       | nd nd       |
| unknown SQT #3          | 0.976 0.08 | 2.77 0.22  | 0.124 0.02 | nd nd      | nd nd       | 0.399 0.07 | 0.014 <0.01 | nd nd       | nd nd       |
| Thujopsane-2β-ol        | 8.30 1.04  | 33.1 4.0   | 1.91 0.30  | nd nd      | nd nd       | nd nd      | nd nd       | nd nd       | nd nd       |
| +unknown SQT #4         | 8.30 1.04  | 33.1 4.0   | 1.91 0.30  | nd nd      | nd nd       | nd nd      | nd nd       | nd nd       | nd nd       |
| Widdrol                 | 0.501 0.04 | 3.47 0.31  | 0.113 0.03 | nd nd      | nd nd       | nd nd      | nd nd       | 0.005 <0.01 | nd nd       |
| 10-epi-γ-Eudesmol       | 0.741 0.05 | 3.14 0.26  | 0.707 0.04 | 0.244 0.05 | 0.055 0.02  | 0.255 0.15 | 0.042 <0.01 | nd nd       | nd nd       |
| Cedren-13-ol, 8-        | nd nd      | 1.35 0.14  | 0.511 0.06 | 0.245 0.07 | 0.089 0.06  | nd nd      | nd nd       | nd nd       | nd nd       |



**Table S3** VOC emission rate per mycelium area (pmol plate<sup>-1</sup> cm<sup>-2</sup> h<sup>-1</sup>) for all sampling dates (days post inoculation) of nutrient rich and nutrient poor cultures of solitary fungi; s.e.: standard error (n = 5); nd: not detectable.

| <i>Alternaria alternata</i> solitary  A | nutrient rich (malt extract gelrite) |            |             |             |             | nutrient poor (synthetic nutrient poor gelrite) |             |             |             |
|-----------------------------------------|--------------------------------------|------------|-------------|-------------|-------------|-------------------------------------------------|-------------|-------------|-------------|
|                                         | 3                                    | 7          | 14          | 21          | 28          | 14                                              | 21          | 28          | 35          |
| Compounds                               | days s.e.                            | days s.e.  | days s.e.   | days s.e.   | days s.e.   | days s.e.                                       | days s.e.   | days s.e.   | days s.e.   |
| Isobutanol                              | 0.796 0.23                           | 0.567 0.08 | 0.024 <0.01 | nd nd       | nd nd       | nd nd                                           | nd nd       | nd nd       | nd nd       |
| 2-Methyl-1-butanol                      | 1.94 0.60                            | 1.01 0.12  | 0.040 <0.01 | nd nd       | nd nd       | nd nd                                           | nd nd       | nd nd       | nd nd       |
| β-Elemene                               | 1.08 0.27                            | 0.330 0.02 | 0.061 0.01  | 0.028 <0.01 | 0.004 <0.01 | 0.034 <0.01                                     | 0.003 <0.01 | nd nd       | 0.001 <0.01 |
| Di-epi-α-cedrene                        | 1.97 0.48                            | 0.684 0.04 | 0.137 0.04  | 0.053 <0.01 | 0.009 0.01  | 0.056 0.01                                      | 0.005 <0.01 | nd nd       | 0.001 <0.01 |
| α-Cedrene                               | 2.72 0.66                            | 0.781 0.05 | 0.186 0.03  | nd nd       | 0.013 <0.01 | nd nd                                           | 0.004 <0.01 | nd nd       | 0.003 <0.01 |
| β-Cedrene                               | 90.3 22.5                            | 21.6 2.6   | 4.05 0.43   | 2.13 0.39   | 0.181 0.09  | 2.19 0.52                                       | 0.165 0.05  | 0.007 <0.01 | 0.052 0.01  |
| Thujopsene                              | 28.1 5.0                             | 14.7 0.6   | 3.07 0.42   | 1.46 0.41   | 0.177 0.12  | 0.885 0.11                                      | 0.299 0.04  | 0.052 <0.01 | 0.089 0.02  |
| δ-Elemene                               | nd nd                                | nd nd      | nd nd       | nd nd       | nd nd       | nd nd                                           | nd nd       | nd nd       | nd nd       |
| (E)-β-Farnesene                         | nd nd                                | 0.561 0.02 | 0.055 <0.01 | 0.014 0.01  | 0.001 <0.01 | 0.048 <0.01                                     | 0.004 <0.01 | 0.001 <0.01 | 0.001 <0.01 |
| β-acoradiene                            | 4.66 1.11                            | 1.29 0.10  | 0.320 0.06  | 0.173 0.03  | 0.036 0.01  | 0.192 0.03                                      | 0.017 <0.01 | nd nd       | nd nd       |
| α-Himachalene                           | 4.99 1.02                            | 1.57 0.14  | 0.376 0.06  | 0.237 0.04  | 0.020 <0.01 | 0.295 0.07                                      | 0.021 <0.01 | nd nd       | 0.008 <0.01 |
| β-Chamigrene                            | 3.64 0.79                            | 1.49 0.14  | 0.205 0.04  | 0.057 <0.01 | nd nd       | nd nd                                           | nd nd       | nd nd       | nd nd       |
| unknown SQT #2                          | 0.110 0.03                           | 0.210 0.02 | 0.007 <0.01 | 0.018 <0.01 | 0.001 <0.01 | 0.022 <0.01                                     | nd nd       | 0.001 <0.01 | 0.001 <0.01 |
| unknown SQT #1                          | 16.82 4.7                            | 5.771 0.32 | 1.09 0.21   | 0.422 0.06  | 0.057 0.02  | 0.076 0.01                                      | 0.046 0.01  | nd nd       | nd nd       |
| allo-Aromadendrene                      | 3.18 0.77                            | 0.917 0.06 | 0.123 0.03  | 0.056 0.01  | nd nd       | 0.064 0.03                                      | nd nd       | nd nd       | nd nd       |
| γ-Curcumene                             | 3.37 0.90                            | 1.31 0.24  | 0.193 0.03  | 0.084 0.02  | nd nd       | 0.085 0.03                                      | nd nd       | 0.004 <0.01 | nd nd       |
| Germacrene D                            | 4.29 1.02                            | 1.36 0.09  | 0.253 0.05  | 0.114 0.03  | 0.009 <0.01 | 0.120 0.03                                      | 0.012 <0.01 | 0.001 <0.01 | 0.004 <0.01 |
| Eremophilene                            | 2.24 0.70                            | 0.508 0.05 | nd nd       | nd nd       | nd nd       | nd nd                                           | nd nd       | nd nd       | nd nd       |
| α-Chamigrene                            | 1.45 0.38                            | 0.515 0.02 | 0.066 0.01  | 0.049 <0.01 | 0.010 <0.01 | 0.029 <0.01                                     | 0.003 <0.01 | nd nd       | 0.001 <0.01 |
| γ-cadinene                              | 2.33 0.58                            | 0.757 0.06 | 0.133 0.03  | 0.122 0.02  | 0.025 0.01  | 0.069 0.02                                      | 0.007 <0.01 | nd nd       | 0.002 <0.01 |
| unknown SQT #3                          | 0.811 0.14                           | 0.284 0.02 | 0.048 <0.01 | nd nd       | 0.001 <0.01 | nd nd                                           | 0.003 <0.01 | nd nd       | 0.002 <0.01 |
| Thujopsane-2β-ol<br>+unknown SQT #4     | 7.10 1.06                            | 3.24 0.22  | 0.618 0.10  | 0.139 0.02  | 0.034 <0.01 | nd nd                                           | nd nd       | 0.037 <0.01 | 0.049 <0.01 |
| Widdrol                                 | 0.476 0.08                           | 0.333 0.02 | 0.045 <0.01 | 0.003 <0.01 | 0.001 <0.01 | nd nd                                           | nd nd       | 0.005 <0.01 | 0.001 <0.01 |
| 10-epi-γ-Eudesmol                       | 0.612 0.10                           | 0.322 0.02 | 0.081 <0.01 | 0.053 <0.01 | 0.031 <0.01 | 0.053 <0.01                                     | 0.011 <0.01 | 0.003 <0.01 | 0.005 <0.01 |
| Cedren-13-ol, 8-                        | nd nd                                | 0.186 0.02 | 0.025 <0.01 | 0.026 <0.01 | 0.018 <0.01 | nd nd                                           | nd nd       | nd nd       | nd nd       |

| <i>Fusarium oxysporum</i> solitary  F | nutrient rich (malt extract gelrite) |              |             |              |             | nutrient poor (synthetic nutrient poor gelrite) |              |             |             |
|---------------------------------------|--------------------------------------|--------------|-------------|--------------|-------------|-------------------------------------------------|--------------|-------------|-------------|
|                                       | 3                                    | 7            | 14          | 21           | 28          | 14                                              | 21           | 28          | 35          |
| Compounds                             | days s.e.                            | days s.e.    | days s.e.   | days s.e.    | days s.e.   | days s.e.                                       | days s.e.    | days s.e.   | days s.e.   |
| Isobutanol                            | 0.979 0.29                           | nd nd        | nd nd       | nd nd        | nd nd       | <0.001 <0.01                                    | nd nd        | nd nd       | nd nd       |
| 2-Methyl-1-butanol                    | 1.38 0.35                            | 0.103 0.08   | 0.002 <0.01 | nd nd        | nd nd       | nd nd                                           | nd nd        | nd nd       | nd nd       |
| β-Elemene                             | 0.035 0.02                           | nd nd        | nd nd       | nd nd        | nd nd       | <0.001 <0.01                                    | <0.001 <0.01 | nd nd       | nd nd       |
| β-Cedrene                             | 0.103 0.03                           | 0.022 <0.01  | 0.005 <0.01 | 0.001 <0.01  | nd nd       | nd nd                                           | nd nd        | nd nd       | nd nd       |
| δ-Elemene                             | 2.63 0.97                            | 0.552 0.13   | 0.049 <0.01 | 0.018 <0.01  | 0.010 <0.01 | 0.040 0.01                                      | nd nd        | 0.004 <0.01 | nd nd       |
| β-acoradiene                          | 0.336 0.08                           | 0.070 <0.01  | 0.007 <0.01 | nd nd        | nd nd       | 0.021 <0.01                                     | 0.001 <0.01  | nd nd       | nd nd       |
| α-Himachalene                         | 1.22 0.40                            | 0.255 0.04   | 0.026 <0.01 | 0.009 <0.01  | 0.005 <0.01 | 0.020 <0.01                                     | 0.005 <0.01  | nd nd       | 0.001 <0.01 |
| unknown SQT #2                        | nd nd                                | <0.001 <0.01 | nd nd       | <0.001 <0.01 | nd nd       | nd nd                                           | nd nd        | nd nd       | nd nd       |
| γ-Curcumene                           | nd nd                                | nd nd        | 0.003 <0.01 | 0.002 <0.01  | nd nd       | 0.001 <0.01                                     | nd nd        | 0.002 <0.01 | nd nd       |
| Germacrene D                          | nd nd                                | 0.004 <0.01  | nd nd       | nd nd        | nd nd       | nd nd                                           | nd nd        | nd nd       | nd nd       |

**Table S4** VOC emission rate normalized to the projected mycelium area (pmol plate<sup>-1</sup> cm<sup>-2</sup> h<sup>-1</sup>) of *A. alternata* on nutrient rich and nutrient poor co-cultivations; s.e.: standard error (n = 5); nd: not detectable.

| split-plate F A                     | nutrient rich (malt extract gelrite) |            |             |             |              |             | nutrient poor (synthetic nutrient poor gelrite) |              |             |              |  |
|-------------------------------------|--------------------------------------|------------|-------------|-------------|--------------|-------------|-------------------------------------------------|--------------|-------------|--------------|--|
|                                     | 3                                    | 7          | 14          | 21          | 28           |             | 14                                              | 21           | 28          | 35           |  |
| Compounds                           | days s.e.                            | days s.e.  | days s.e.   | days s.e.   | days s.e.    | days s.e.   | days s.e.                                       | days s.e.    | days s.e.   | days s.e.    |  |
| Isobutanol                          | 0.872 0.10                           | 0.203 0.03 | nd nd       | nd nd       | nd nd        | nd nd       | nd nd                                           | nd nd        | nd nd       | nd nd        |  |
| 2-Methyl-1-butanol                  | 1.56 0.23                            | 0.325 0.05 | nd nd       | nd nd       | nd nd        | nd nd       | nd nd                                           | nd nd        | nd nd       | nd nd        |  |
| β-Elemene                           | 0.743 0.10                           | 0.226 0.02 | 0.018 <0.01 | 0.004 <0.01 | 0.002 <0.01  | 0.031 <0.01 | 0.002 <0.01                                     | nd nd        | nd nd       | nd nd        |  |
| Di-epi-α-cedrene                    | 1.39 0.17                            | 0.515 0.06 | 0.030 <0.01 | nd nd       | 0.009 <0.01  | 0.048 <0.01 | 0.002 <0.01                                     | nd nd        | 0.002 <0.01 | 0.002 <0.01  |  |
| α-Cedrene                           | 1.92 0.23                            | 0.648 0.06 | 0.053 <0.01 | 0.011 <0.01 | 0.003 <0.01  | nd nd       | 0.003 <0.01                                     | nd nd        | 0.001 <0.01 | 0.001 <0.01  |  |
| β-Cedrene                           | 63.8 7.7                             | 19.2 1.5   | 1.31 0.32   | 0.137 0.07  | 0.028 0.02   | 1.80 0.28   | 0.071 <0.01                                     | nd nd        | nd nd       | nd nd        |  |
| Thujopsene                          | 21.1 3.3                             | 10.8 0.6   | 1.06 0.32   | 0.168 0.11  | 0.035 0.02   | 0.717 0.09  | 0.088 <0.01                                     | 0.004 <0.01  | 0.001 <0.01 | 0.001 <0.01  |  |
| δ-Elemene                           | 0.606 0.09                           | 0.241 0.04 | 0.009 <0.01 | 0.022 <0.01 | 0.012 <0.01  | 0.131 0.02  | nd nd                                           | 0.019 <0.01  | nd nd       | nd nd        |  |
| (E)-β-Farnesene                     | nd nd                                | 0.357 0.03 | 0.001 <0.01 | nd nd       | 0.001 <0.01  | 0.046 0.01  | 0.001 <0.01                                     | nd nd        | nd nd       | nd nd        |  |
| β-acoradiene                        | 3.41 0.41                            | 1.10 0.10  | 0.100 0.02  | 0.020 <0.01 | 0.015 <0.01  | 0.216 0.05  | 0.008 <0.01                                     | nd nd        | nd nd       | nd nd        |  |
| α-Himachalene                       | 3.32 0.34                            | 1.05 0.11  | 0.158 <0.01 | 0.021 <0.01 | 0.009 <0.01  | 0.302 0.03  | 0.011 <0.01                                     | 0.011 <0.01  | 0.005 <0.01 | 0.005 <0.01  |  |
| β-Chamigrene                        | 2.41 0.31                            | 0.901 0.05 | nd nd       | nd nd       | nd nd        | nd nd       | nd nd                                           | nd nd        | nd nd       | nd nd        |  |
| unknown SQT #2                      | 0.078 <0.01                          | 0.141 0.01 | 0.002 <0.01 | 0.001 <0.01 | <0.001 <0.01 | 0.019 <0.01 | <0.001 <<0.01                                   | 0.001 <0.01  | nd nd       | nd nd        |  |
| unknown SQT #1                      | 11.6 1.6                             | 3.74 0.54  | 0.116 0.01  | 0.053 <0.01 | nd nd        | 0.251 0.15  | 0.015 <0.01                                     | nd nd        | nd nd       | nd nd        |  |
| allo-Aromadendrene                  | 2.19 0.26                            | 0.658 0.06 | 0.014 <0.01 | nd nd       | nd nd        | 0.086 0.04  | nd nd                                           | nd nd        | nd nd       | nd nd        |  |
| γ-Curcumene                         | 2.19 0.29                            | 0.723 0.09 | 0.056 0.02  | 0.004 <0.01 | nd nd        | 0.137 0.03  | nd nd                                           | 0.006 <0.01  | nd nd       | nd nd        |  |
| Germacrene D                        | 2.95 0.34                            | 0.970 0.08 | 0.062 0.02  | 0.005 <0.01 | 0.001 <0.01  | 0.099 0.01  | 0.004 <0.01                                     | <0.001 <0.01 | nd nd       | nd nd        |  |
| Eremophilene                        | 1.03 0.18                            | 0.408 0.02 | nd nd       | nd nd       | nd nd        | nd nd       | nd nd                                           | nd nd        | nd nd       | nd nd        |  |
| α-Chamigrene                        | 1.03 0.13                            | 0.331 0.03 | 0.022 <0.01 | 0.003 <0.01 | 0.001 <0.01  | 0.031 0.01  | 0.001 <0.01                                     | nd nd        | nd nd       | nd nd        |  |
| γ-cadinene                          | 1.57 0.19                            | 0.514 0.04 | 0.054 0.01  | 0.008 <0.01 | 0.003 <0.01  | 0.062 <0.01 | 0.003 <0.01                                     | nd nd        | nd nd       | <0.001 <0.01 |  |
| unknown SQT #3                      | 0.54 0.09                            | 0.144 0.01 | 0.002 <0.01 | nd nd       | nd nd        | nd nd       | 0.001 <0.01                                     | nd nd        | nd nd       | nd nd        |  |
| Thujopsane-2β-ol<br>+unknown SQT #4 | 4.80 0.88                            | 2.10 0.24  | 0.050 0.01  | nd nd       | nd nd        | nd nd       | nd nd                                           | nd nd        | nd nd       | nd nd        |  |
| Widdrol                             | 0.328 0.05                           | 0.172 0.01 | 0.001 <0.01 | nd nd       | nd nd        | nd nd       | nd nd                                           | nd nd        | nd nd       | nd nd        |  |
| 10-epi-γ-Eudesmol                   | 0.423 0.07                           | 0.189 0.02 | 0.021 <0.01 | 0.006 <0.01 | 0.002 <0.01  | nd nd       | 0.004 <0.01                                     | 0.001 <0.01  | nd nd       | nd nd        |  |
| Cedren-13-ol, 8-                    | nd nd                                | 0.160 0.02 | 0.017 <0.01 | 0.002 <0.01 | 0.003 <0.01  | nd nd       | nd nd                                           | nd nd        | nd nd       | nd nd        |  |

**direct confrontation FA**

| Compounds                           | 3           | 7           | 14          | 21          | 28           | 14         | 21           | 28           | 35          |
|-------------------------------------|-------------|-------------|-------------|-------------|--------------|------------|--------------|--------------|-------------|
|                                     | days s.e.   | days s.e.   | days s.e.   | days s.e.   | days s.e.    | days s.e.  | days s.e.    | days s.e.    | days s.e.   |
| Isobutanol                          | 1.15 0.16   | 0.292 0.07  | nd nd       | nd nd       | nd nd        | nd nd      | nd nd        | nd nd        | nd nd       |
| 2-Methyl-1-butanol                  | 2.01 0.24   | 0.507 0.13  | nd nd       | nd nd       | nd nd        | nd nd      | nd nd        | nd nd        | nd nd       |
| β-Elemene                           | 0.870 0.07  | 0.290 <0.01 | 0.046 <0.01 | 0.013 <0.01 | 0.003 <0.01  | 0.148 0.04 | 0.003 <0.01  | nd nd        | nd nd       |
| Di-epi-α-cedrene                    | 1.58 0.14   | 0.682 0.02  | 0.116 0.02  | 0.016 <0.01 | 0.038 0.02   | 0.305 0.09 | 0.003 <0.01  | nd nd        | 0.002 <0.01 |
| α-Cedrene                           | 2.25 0.21   | 0.837 0.03  | 0.155 0.02  | 0.035 <0.01 | 0.007 <0.01  | nd nd      | 0.005 <0.01  | nd nd        | 0.002 <0.01 |
| β-Cedrene                           | 72.8 6.8    | 24.7 0.7    | 4.27 0.55   | 0.551 0.11  | 0.072 0.04   | 13.0 3.8   | 0.134 0.02   | nd nd        | nd nd       |
| Thujopsene                          | 19.3 3.0    | 12.0 0.7    | 2.86 0.25   | 0.435 0.07  | 0.055 0.03   | 1.62 0.61  | 0.065 <0.01  | nd nd        | 0.001 <0.01 |
| δ-Elemene                           | 1.88 0.22   | 0.783 0.05  | 0.019 <0.01 | 0.022 <0.01 | 0.009 <0.01  | 0.292 0.07 | nd nd        | 0.022 <0.01  | nd nd       |
| (E)-β-Farnesene                     | 0.550 0.08  | 0.361 0.01  | nd nd       | nd nd       | 0.001 <0.01  | 0.230 0.08 | 0.002 <0.01  | 0.001 <0.01  | nd nd       |
| β-acoradiene                        | 3.94 0.36   | 1.42 0.04   | 0.257 0.03  | 0.046 <0.01 | 0.027 0.01   | 0.868 0.20 | 0.012 <0.01  | nd nd        | nd nd       |
| α-Himachalene                       | 6.99 1.86   | 1.31 0.04   | 0.491 0.08  | 0.051 0.01  | 0.018 <0.01  | 1.63 0.39  | 0.018 <0.01  | 0.026 <0.01  | 0.009 <0.01 |
| β-Chamigrene                        | 2.30 0.29   | 0.998 0.07  | nd nd       | nd nd       | nd nd        | nd nd      | nd nd        | nd nd        | nd nd       |
| unknown SQT #2                      | 0.087 <0.01 | 0.144 0.03  | 0.006 <0.01 | 0.003 <0.01 | <0.001 <0.01 | 0.107 0.03 | <0.001 <0.01 | 0.001 <0.01  | nd nd       |
| unknown SQT #1                      | 13.6 1.6    | 5.40 0.14   | 0.390 0.14  | 0.105 0.01  | 0.027 <0.01  | 0.231 0.07 | 0.030 <0.01  | nd nd        | nd nd       |
| allo-Aromadendrene                  | 2.52 0.23   | 0.854 0.02  | 0.106 0.02  | nd nd       | nd nd        | 0.454 0.12 | nd nd        | nd nd        | nd nd       |
| γ-Curcumene                         | 2.85 0.26   | 0.877 0.10  | 0.132 0.03  | 0.009 <0.01 | nd nd        | 0.687 0.08 | 0.016 <0.01  | 0.011 <0.01  | nd nd       |
| Germacrene D                        | 3.38 0.32   | 1.21 0.04   | 0.192 0.03  | 0.016 <0.01 | 0.002 <0.01  | 0.607 0.16 | nd nd        | nd nd        | nd nd       |
| Eremophilene                        | 1.38 0.15   | 0.377 0.04  | nd nd       | nd nd       | nd nd        | nd nd      | nd nd        | nd nd        | nd nd       |
| α-Chamigrene                        | 1.29 0.13   | 0.396 0.01  | 0.050 <0.01 | 0.008 <0.01 | 0.002 <0.01  | 0.328 0.09 | 0.002 <0.01  | nd nd        | nd nd       |
| γ-cadinene                          | 1.83 0.17   | 0.630 0.02  | 0.128 0.02  | 0.020 <0.01 | 0.004 <0.01  | 0.349 0.09 | 0.005 <0.01  | nd nd        | nd nd       |
| unknown SQT #3                      | 0.489 0.07  | 0.164 0.02  | 0.004 <0.01 | nd nd       | nd nd        | 0.099 0.01 | <0.001 <0.01 | nd nd        | nd nd       |
| Thujopsane-2β-ol<br>+unknown SQT #4 | 4.31 0.83   | 2.00 0.35   | 0.063 <0.01 | nd nd       | nd nd        | nd nd      | nd nd        | nd nd        | nd nd       |
| Widdrol                             | 0.254 0.04  | 0.207 0.03  | 0.004 <0.01 | nd nd       | nd nd        | nd nd      | nd nd        | <0.001 <0.01 | nd nd       |
| 10-epi-γ-Eudesmol                   | 0.374 0.06  | 0.188 0.03  | 0.023 <0.01 | 0.008 <0.01 | 0.002 <0.01  | 0.060 0.04 | 0.002 <0.01  | nd nd        | nd nd       |
| Cedren-13-ol, 8-                    | nd nd       | 0.081 0.01  | 0.017 <0.01 | 0.009 <0.01 | 0.003 <0.01  | nd nd      | nd nd        | nd nd        | nd nd       |
